# 1 Health professionals' beliefs and 2 attitudes towards preconception care: 3 A systematic review

## 4 5 Authors

6 Cherie Caut<sup>1</sup>, Danielle Schoenaker<sup>2,3,4</sup>, Erica McIntyre<sup>5,6</sup>, Amie Steel<sup>1</sup>

- 7 1. Australian Research Centre in Complementary and Integrative Medicine,  
8 School of Public Health, Faculty of Health, University of Technology Sydney,  
9 Building 10, Level 8, 235-253 Jones Street, Ultimo NSW 2007 Australia.
- 10 2. School of Human Development and Health, Faculty of Medicine, University of  
11 Southampton, Southampton, UK.
- 12 3. MRC Lifecourse Epidemiology Centre, University of Southampton,  
13 Southampton, UK.
- 14 4. NIHR Southampton Biomedical Research Centre, University of Southampton  
15 and University Hospital Southampton NHS Foundation Trust, Southampton,  
16 UK.
- 17 5. Institute for Sustainable Futures, University of Technology Sydney, Building  
18 10, Level 10, 235-253 Jones Street, Ultimo NSW 2007 Australia.  
19 Visiting Fellow
- 20 6. Research Institute for Innovative Solutions for Well-being and Health,  
21 University of Technology Sydney, Ultimo NSW, Australia.

22  
23 Corresponding author: Cherie Caut

24 Corresponding author email: [cherie.d.caut@student.uts.edu.au](mailto:cherie.d.caut@student.uts.edu.au)

25

## 26 Abstract

### 27 **Background**

28 Health professionals have previously identified various barriers and factors that  
29 would help facilitate preconception care services in healthcare settings. Clinically  
30 relevant preconception information and clinical practice guidelines have since been  
31 developed to aid health professionals in preconception care delivery. This systematic  
32 review aimed to 1) synthesise recent literature (past 8 years) describing health  
33 professionals' beliefs and attitudes towards preconception care services or  
34 programmes and 2) determine if the experience of health professionals providing  
35 preconception care has changed compared to literature reviews conducted more than  
36 8 years ago.

### 37 **Methods**

38 Five databases were searched between 27/01/2016 and 20/11/2024. Primary  
39 quantitative and qualitative research studies were included if they examined health  
40 professionals' beliefs and attitudes towards delivering preconception care services or  
41 programmes. Study quality was assessed using the CASP Checklist (qualitative  
42 studies) and AXIS tool (quantitative studies). Data synthesis used thematic  
43 categorisation adapted from the framework approach.

### 44 **Results**

45 Twenty-seven studies were included (n=11 qualitative, n= 14 quantitative, n=2 mixed-  
46 methods studies). Methodological quality was generally good for qualitative studies  
47 but varied for quantitative studies. The results covered three categories: 1)  
48 *addressing preconception care health literacy* (i.e. lack of knowledge, awareness,  
49 training and resources), 2) *clinical practicalities of preconception care* (i.e. need for  
50 coordination of care and clarity on role responsibility), and 3) *the role of the patient*  
51 (i.e. need for public health education to support patient-led conversations).

## 52 **Conclusions**

53 Little has changed regarding the barriers and facilitators to providing preconception  
54 care reported by health professionals. To improve the provision of preconception  
55 care, there is a need to co-develop professional and public preconception health  
56 education, clinical resources, and a coordinated preconception healthcare service  
57 model.

## 58 **Keywords**

59 preconception care, health professionals, beliefs and attitudes, systematic review

60

61

## 62 Introduction

63 People’s modifiable preconception health (PCH) and health behaviours—such as  
64 body composition, lifestyle behaviours, nutrition, environmental exposures, and  
65 birth spacing—can affect maternal and child health[1-3]. The need to address such  
66 risk factors has led to clinical and public health measures that aim to screen for PCH  
67 risks and implement intervention strategies to optimise PCH and the health  
68 behaviours of prospective parents before conception, known as preconception care  
69 (PCC)[4]. The importance of PCC is highlighted by health policies and strategies  
70 produced by a number of countries around the world[5]. It has received dedicated  
71 attention from the World Health Organization[4] as a critically important  
72 component of healthcare that can impact multiple generations.

73

74 While PCC is valuable and important for prospective parents, healthcare providers  
75 experience a range of barriers to implementing PCC services or programmes[6, 7].  
76 Previous systematic reviews that included studies conducted more than five years  
77 ago have reported health professionals’ (HPs) experiences providing PCC and  
78 describe the types of barriers they experience, including but not limited to poor  
79 interprofessional communication, insufficient clinical time, funding, clinically  
80 relevant information, and public and HP awareness of the benefits of PCC[6, 7].  
81 Conversely, HPs reported that adequate knowledge of PCC, prospective parents  
82 discussing their intention to become pregnant or requesting PCC, and clinical PCC  
83 resources would enable them to facilitate PCC[7]. To address some of these barriers  
84 and promote PCC services, clinician-focussed PCC information and guidelines have  
85 been developed[8, 9], and relevant information for implementing PCC programmes  
86 in organisations[10]. A recent systematic review, however, identified that existing

87 clinical practice guidelines (CPGs) on PCC supported by high-quality evidence are  
88 lacking[11]. Emerging research efforts aim to establish population PCH priorities and  
89 co-develop strategies to address them at a healthcare services level[12].

90  
91 While these guidelines aim to assist HPs providing PCC, an up-to-date  
92 understanding of HPs' views towards PCC delivery is needed to identify if the  
93 increasing availability of guidelines has reduced or changed previously reported  
94 barriers and if HPs also require other types of support to implement PCC  
95 meaningfully. Therefore, this systematic review aimed to 1) synthesise recent  
96 literature describing health professionals' beliefs and attitudes towards  
97 preconception care services or programmes and 2) compare these experiences to  
98 previous systematic review findings[6, 7].

99

## 100 Methods

101 This systematic review is reported following the Preferred Reporting Items for  
102 Systematic Reviews and Meta-analyses 2020[13] and was prospectively registered on  
103 the International Prospective Register of Systematic Reviews (PROSPERO;  
104 CRD42021249386).

105

### 106 Eligibility criteria

107 Original primary research (quantitative and qualitative studies) published between  
108 27/01/2016 and 20/11/2024 that sampled HPs (including, but not limited to, general  
109 practitioners, midwives, and obstetricians) and examined their beliefs and/or  
110 attitudes towards delivering PCC services or programmes were eligible for inclusion.

111

112 Information sources

113 Keyword and MeSH terms were employed in the databases MEDLINE (OVID),  
114 EMBASE (OVID), Maternity and Infant Care (OVID), CINAHL (EBSCO), and  
115 PsycINFO (EBSCO), with the following limits: title and abstract, studies in humans,  
116 published between 27/01/2016 to 27/01/2022. A second search was conducted for  
117 articles published between 28/01/2022 to 20/11/2024. No limits to language were  
118 applied. The search strategy is presented in Supplementary File 1.

119

120 Selection process

121 The search was conducted on 27 January 2022 and 20/11/2024. CC completed  
122 electronic database searches and downloaded citations and abstracts into  
123 EndNoteX9 citation management software. Duplication screening occurred before  
124 citations were exported into Covidence systematic review software[14]. Articles were  
125 screened by title and abstract initially by CC, and by DS and AS to establish  
126 reliability. Full-text articles were downloaded and screened initially by CC, followed  
127 by AS, to establish reliability before final inclusion for review. There were no  
128 disagreements between reviewers. References lists of the included studies were  
129 searched for additional eligible studies. Article exclusion reasons from the full-text  
130 screening stage were recorded.

131

132 Data collection process

133 CC initially extracted data from eligible studies into a customised form, followed by  
134 AS to establish reliability.

135

## 136 Data items

137 Data extracted included the study reference, title, aims, type of PCC service, location,  
138 population, study design, data collection method(s), sample size, and findings on HP  
139 beliefs and attitudes towards PCC.

140

## 141 Critical appraisal

142 The Critical Appraisal Skills Programme (CASP) Qualitative Checklist[15] evaluated  
143 study reporting and methodological quality. Quantitative studies were assessed via  
144 the Appraisal tool for Cross-Sectional Studies (AXIS)[16]. CC critically appraised  
145 included studies, and AS assessed 10% of included studies for reliability.

146 Disagreements were discussed until a consensus was reached. A third reviewer (EM  
147 or DS) was invited to adjudicate if unresolved.

148

## 149 Synthesis methods

150 A framework approach for applied and policy-relevant research was employed to  
151 analyse the data, identify common themes across the studies, and then categorise  
152 these findings to determine the key themes[17]. Findings on beliefs and attitudes  
153 towards PCC from the included studies were extracted by CC reading and re-reading  
154 each paper, and reviewed by AS, DS and EM. Common themes were then identified  
155 across the studies and further defined into categories. Each study was assigned as  
156 many categories as relevant to their reported findings.

## 157 Results

### 158 Study selection

159 Searches retrieved 604 articles. After removing duplicates, 376 titles and abstracts  
160 were screened (Figure 1). Thirty-seven full-text articles were checked for eligibility;

161 27 met the inclusion criteria and were included in this review. Reasons for exclusion  
162 at full-text screening are presented in Supplementary File 2.

163

164 **[Insert Figure 1. Prisma flow diagram]**

165

166 Study characteristics

167 All articles (n=27) were published in English between 2017 and 2023 (Table 1).

168 Fourteen studies[18-31] employed a cross-sectional study design and survey method

169 for data collection. Eleven qualitative studies were identified utilising focus groups

170 (n=4)[32-35] or interviews (n=7)[36-42]. Two studies[43, 44] collected data using

171 mixed methods; Devido et al. [43] employed a focus group and survey, and Mass et

172 al. [44] a survey and interactive workshop. The included studies were conducted in

173 Australia (n=6)[21-24, 29, 30]; the United States (US; n=5)[18, 25, 41-43]; the

174 Netherlands (n=4)[31, 33, 37, 44]; United Kingdom (UK) (n=2)[35, 38]; India

175 (n=2)[20, 34]; and one study each in New Zealand[19], Europe[36], Indonesia[32],

176 Canada[26], Malawi[39], South Africa[27], Nigeria[40], and China[28]. A range of

177 HPs were represented, including but not limited to pharmacists, nurses, midwives,

178 general practitioners, obstetricians and gynaecologists. Sample size varied among the

179 qualitative (n=11 to 92), quantitative (n=77 to 992) and mixed-methods (n=48 to

180 299) studies.

181

182 **[Insert Table 1. Characteristics of included studies]**

183

184 Critical appraisal of included studies

185 Quality assessment details are presented in Table 2 and Table 3 for qualitative and

186 quantitative studies, respectively.

187



188 Most of the qualitative studies fulfilled all the CASP checklist[15] criteria for  
189 assessing methodological quality. One study[39] needed to be more transparent on  
190 the appropriateness of the recruitment strategy, consideration of researcher bias and  
191 rigour of data analysis. The methodological quality of the quantitative studies was  
192 varied[16]. Sample size justification, non-response bias and funding sources or  
193 conflicts of interest were the most poorly reported criteria, followed by the use of  
194 instruments or measurements that had been trialled, piloted, or published  
195 previously.

196

### 197 **[Item Table 2. CASP Quality Assessment]**

### 198 **[Item Table 3. AXIS Quality Assessment]**

199

200 Results of syntheses

201 Three common thematic categories across the findings from the reviewed studies  
202 were identified and defined: *addressing preconception care health literacy, clinical*  
203 *practicalities of preconception care, and the role of the patient.*

204

### 205 **Addressing preconception care health literacy**

206 Twenty-three studies reported findings related to addressing PCC health literacy[18-  
207 26, 28-36, 38, 39, 41-43]. These studies addressed PCH knowledge, clinical training  
208 needs and access to resources.

209

210 Preconception health knowledge gaps

211 Insufficient knowledge about PCH as a barrier to HPs' PCC practices was commonly  
212 reported. For example, an Australian cross-sectional study of GPs (n=110) found  
213 their lack of knowledge of PCC guidelines to be one of the most common barriers to

214 their delivery of PCC[24]; this view was shared by 40% of midwives in a second  
215 Australian study[21] and 95% of nurses in another Australian study[30], a broader  
216 group of HPs from a UK qualitative study.[38] The lack of knowledge as a barrier to  
217 PCC provision also applied to GPs (n=304) in Australia providing care to men[23], of  
218 whom almost all respondents (90%) indicated that they did not feel confident about  
219 their knowledge of the factors affecting male fertility[23]. A cross-sectional study on  
220 midwives (n=338) from Australia[29] found that most (85%) rated their overall  
221 knowledge about pre and interconception health for women as excellent or above  
222 average, although for men or partners, a higher proportion of participants (40%)  
223 reported their overall knowledge as below average, poor or none. Participants with  
224 more than 11 years of experience were more likely to report above average to  
225 excellent knowledge (OR 3.11; 95% CI 1.09, 8.85), although, for men or partners, this  
226 association was limited to midwives with more than 21 years of experience (OR 2.20;  
227 95% CI 1.18, 4.11). Another cross-sectional study from Australia[30], on nurses  
228 (n=152) found that only one in 20 respondents agreed that they had excellent  
229 knowledge about PCC for women and men. When asked to rate their knowledge of  
230 the importance of women's health in the preconception period, over half (54%)  
231 reported average to below-average levels. Regarding the importance of men's health  
232 in the preconception period, this increased to two-thirds of respondents (67%)  
233 reporting average to below average knowledge. In contrast, a study[28] of HPs in  
234 China found that 26.9% of those providing care to women with type 1 diabetes felt  
235 they lacked the knowledge to deliver PCC to this population. At the same time, a US  
236 study reported a significant positive association between teaching self-efficacy and  
237 preconception counselling knowledge among parish nurses (n=48) providing  
238 diabetes education to women with diabetes[43]. Only one cross-sectional study  
239 sampling dentists and gynaecologists (n=300) from India investigated clinician

240 characteristics associated with PCH knowledge[20]. It was found in logistic  
241 regression analyses that older age doctors (Adjusted odds ratio [AOR]=1.055 (95%  
242 Confidence interval [CI]: 1.055-1.092,  $p=0.002$ ), the field of specialisation - dentists  
243 (AOR=1.635, 95% CI: 1.064-2.511,  $p=0.002$ ), and years of practicing experience > 5  
244 years (AOR=2.254, 95% CI: 1.46-3.45,  $p=0.001$ ) were significantly associated with  
245 higher knowledge levels of periodontal health and adverse pregnancy outcomes[20].  
246 One qualitative study from India on healthcare workers (n=45)[34] found that most  
247 had some knowledge about preconception care, limited to adolescent health and  
248 family planning services. A qualitative study from the UK on pharmacists (n=11)[35]  
249 found that lower knowledge scores were related to a lack of training and a lack of  
250 confidence in oneself.

251

252

253 Awareness of preconception risks and guidelines

254 HPs reported needing to be made aware of PCH risks and of existing CPGs designed  
255 to assist them in screening for PCH risks and delivering PCH interventions[19-21, 23,  
256 24, 26, 43]. This issue was highlighted in a study involving dentists and  
257 gynaecologists (n=300), where only 79% were aware of the association between  
258 periodontal health and preterm low birth weight[20]. In Australia, a study of GPs  
259 (n=110) found that only 53% were aware of PCC-CPGs[24]. Similarly, a qualitative  
260 study on healthcare providers (n=20) from the US[42] showed a lack of awareness of  
261 published PCC guidelines. In contrast, healthcare workers (n=45) in a qualitative  
262 study from India were aware that there is no formal PCC program in the country[34].  
263 Even where HPs reported being aware of guidelines, familiarity with the  
264 recommendations may pose another barrier, as indicated in an Australian cross-  
265 sectional study where fewer HPs (including GPs, obstetricians and gynaecologists,

266 midwives and dietitians) were aware of the recommended dose (38%) or duration  
267 (44%) of preconception iodine supplementation[21]. This was despite 71% of those  
268 HPs being aware that the National Health and Medical Research Council  
269 recommends this intervention[21]. In this Australian study, awareness of the  
270 recommendation was positively associated with recommending iodine  
271 supplements[21]. In contrast, in a cross-sectional study of GPs (n=200) in New  
272 Zealand (NZ), most GPs reported being aware of the risks of obesity in pregnancy,  
273 over 50% of these GPs reported practice that was inconsistent with guidelines, and  
274 only 12% of these same GPs were aware of the New Zealand Ministry of Health  
275 Guidance for Healthy Weight in Pregnancy[19]. A similar finding was found in a  
276 Canadian cross-sectional study assessing periconceptual folic acid  
277 recommendations of GPs (n=77), where only half knew the correct dose and duration  
278 of folic acid for low-risk women[26]. In the Netherlands, most (64.2 %) but not all  
279 the respondents in a cross-sectional study on midwives and obstetricians(n=83)[31]  
280 believe the scientific proof of the effectiveness of PCC to be sufficient.

281

282

283 The desire for further training  
284 HPs reported wanting more information and education on PCH risks and  
285 interventions[21-23, 33, 39] to improve their confidence in delivering PCC[22, 23,  
286 30]. For example, in a cross-sectional study of Australian health professionals  
287 (n=396), HPs (including GPs, obstetricians and gynaecologists, midwives and  
288 dietitians) indicated they would be interested in receiving new information relating  
289 to iodine[21], and in another Australian cross-sectional study almost all maternal  
290 child and family health nurses (MCaFHN) (n=192) agreed that more information and  
291 formal education opportunities on the topic would increase their confidence to

292 discuss PCH[22]. Most (87%) nurses (n=152) in another cross-sectional study from  
293 Australia[30] indicated that more education would increase their confidence in  
294 delivering PCC. Most midwives (n=338) in a cross-sectional study from Australia[29]  
295 desired further education on managing pre-existing health conditions (69%) and on  
296 optimising reproductive health (66%). Healthcare workers (n=45) suggested the  
297 need for program-specific guidelines and training in a qualitative study from  
298 India[34]. There was a consensus among pharmacists (n=11) in a qualitative study  
299 from the UK[35] that insufficient training opportunities exist. A majority (54.6%) of  
300 Australian GPs (n=304) suggested that more information and education about  
301 factors that affect male fertility would make them more confident to talk to male  
302 patients about fertility[23]. Some studies specifically identified lack of training as the  
303 barrier to providing PCC and an increased likelihood of HPs providing PCH  
304 information and PCC to their patients if they had received further training[18, 25, 28,  
305 32, 36, 41]. For example, in a cross-sectional study from the US, 15% of GPs (n=443)  
306 reported they needed training before implementing PCC[25]. In another cross-  
307 sectional study from the US, obstetricians and gynaecologists (n=297) reported  
308 offering expanded carrier screening more commonly if they were fellowship-trained  
309 (80%) compared to those who were not (70%)[18].

310

#### 311 Access to resources

312 Ten studies reported findings related to clinician access to resources supporting PCC  
313 delivery[21-24, 30, 38, 41, 43]. The types of resources participants suggested include  
314 sample meal plans[21], screening guidelines, relevant research findings[21], online  
315 tools[22, 30], factsheets, trustworthy websites[22, 23, 30], waiting room posters[23],  
316 checklists, brochures[24], expert clinician champions, and medical record  
317 prompts[41]. Two other qualitative studies reported structural resource

318 requirements such as PCC policy and procedures used to support them to implement  
319 PCC programs into clinical practice settings, as reported in a study of HPs (n=92)  
320 from the US[41] and a funding model through third-party reimbursement to improve  
321 the delivery of PCC as described by HPs (n=30) in a study from the Netherlands[33].

322

### 323 **Clinical practicalities of preconception care**

324 Twenty studies reported findings related to the clinical practicalities of PCC[20-25,  
325 27-30, 32-35, 37, 39-42, 44].

#### 326 Coordination of care

327 In some studies, HPs reported that a lack of interprofessional referral and care  
328 coordination was a barrier to providing PCC[20, 28, 29, 32-34, 37, 41, 44]. One  
329 cross-sectional study of dentists and gynaecologists (n=300) from India, for  
330 example, found that gynaecologists rarely refer to dentists despite being aware of the  
331 link between periodontal health and preterm low birth weight, and only 12% of  
332 gynaecologists referred patients to the dentists in the preconception period.[20]

333 Several studies[20, 28, 32, 33] reported HPs describing a desire for an integrated,  
334 multi-disciplinary approach to providing PCC services, greater coordination and  
335 referral networks between HPs[29, 33, 35, 37, 41, 44] and emphasised the  
336 importance of patient follow-up[41]. In a study from the Netherlands, HPs (n=299)  
337 suggested that while the responsibility for providing PCC consultations is best suited  
338 to primary care, many other HPs involved may act as referrers towards PCC[44].

339

#### 340 Role responsibility

341 Most HPs in the included studies believed it to be part of their role to provide  
342 preconception risk screening, PCH promotion and provision or referral for PCH  
343 interventions. These include GPs[23, 24, 30, 44], MCaFHNs[22], midwives[29, 44],

344 nurses[27], pharmacists[35], obstetricians and gynaecologists[42] and specialist  
345 physicians[40]. In a qualitative study from the Netherlands, HPs (including  
346 midwives, obstetricians and gynaecologists, fertility specialists, GPs, preventive child  
347 health care workers, maternity health care providers, physiotherapists, pharmacists  
348 and dieticians) (n=30) expressed that the provision of PCC is challenging due to  
349 unclear allocation of responsibilities[33]. Although HPs (including midwives, nurses,  
350 obstetricians and gynaecologists and GPs) acknowledged that the responsibility to  
351 provide PCC consultations lies with all professions[39] in an Australian cross-  
352 sectional study, 84% of GPs (n=110) reported that they should be the primary  
353 providers of PCC[24]. In a mixed-methods study from the Netherlands, HPs  
354 (including nurses, midwives, GPs, physiotherapists, preventive child healthcare  
355 professionals, dieticians, policy officers, maternity care assistants, and  
356 gynaecologists) (n=299) suggested that the responsibility for providing PCC  
357 consultations lies within primary care, mainly GPs (95.6%) and midwives  
358 (94.4%)[44]. In this same study, HPs found it significantly more challenging to start  
359 a conversation about a wish to conceive than midwives (26.8% versus 20.2%,  
360  $p=0.006$ )[44]; they felt less competent to provide preconception information (32.3%  
361 versus 15.1%,  $p<0.001$ )[44]. Similar findings were reported in a cross-sectional  
362 study from the US (n=443), where most GPs (88%) felt pregnancy intention  
363 screening should be routinely included in primary care[25]. In contrast, in a  
364 qualitative study from Nigeria, HPs (including nurses and specialist physicians)  
365 (n=26) stated that PCC services should be offered at all levels of health care with  
366 referral when needed[40]. Specialist physicians from this Nigerian study also  
367 identified the relevance of PCC to their practice, stating that those with chronic  
368 diseases would benefit more[40]. In a cross-sectional study from Australia on  
369 midwives' (n=338), most (88%) reported that they often encounter health states that

370 could be managed before pregnancy (88%)[29]. Pharmacists (n=11) in a qualitative  
371 study from the UK[35] discussed how they are frequently asked for conception  
372 advice, particularly by those experiencing difficulties in conceiving or those wanting  
373 advice on optimising health to conceive.

374

375  
376 Clinician time

377 HPs report that one of the barriers to providing effective PCC is an insufficient  
378 amount of consultation time[21, 22, 24, 29, 30, 32, 34, 35]. For example, in an  
379 Australian cross-sectional study[21], the main reason for not discussing dietary  
380 sources of iodine with women was insufficient time[21]. Time constraints were also  
381 reported by MCaFHNs (n=192)[22], GPs (n=110)[24], pharmacists[35], and a  
382 broader range of HPs (n=32)[32, 34], as the most frequently endorsed barrier to  
383 promoting PCH. Several of the MCaFHNs (n=192) suggested that adding a scheduled  
384 visit dedicated to interconception health advice to those who want it would be  
385 helpful[22].

386

### 387 **The role of the patient**

388 Twelve studies reported findings related to the role of the patient[18, 23, 31, 34, 35,  
389 37-39, 41, 42, 44].

390

391 Community education and health promotion

392 Four studies indicated that HPs would like to see an increase in public health  
393 education that improves their patients' knowledge of PCH risk factors and the  
394 benefits of PCC[18, 37, 44] and perceive the absence of such community awareness  
395 as a barrier to PCC[34, 37]. Most (56%) obstetricians and gynaecologists (n=297)



396 believed that offering expanded carrier screening to their patients should be  
397 restricted to those diseases important to the couple, and 52% believed that screening  
398 should only occur when the clinical significance of each disease being screened for is  
399 understood by the couple[18]. In a qualitative study from the Netherlands, HPs  
400 (including midwives, GPs, obstetricians and gynaecologists, cardiologists and  
401 gastroenterologists) (n=20) stated that barriers affecting the uptake and delivery of  
402 PCC included their belief that most future parents lacked awareness of the benefits of  
403 PCC[37]. These findings were similar to another qualitative study from India[34],  
404 where healthcare workers (n=45) found that preconception was not viewed as a  
405 critical phase in the woman's reproductive cycle, and women would rarely think of  
406 eating a balanced diet before pregnancy.

407

#### 408 Patient-led conversations

409 Despite believing that PCC is a part of their role, HPs also perceive that the onus of  
410 responsibility to seek PCH information and PCC is shared with the patient and that  
411 improved public education on PCH risks and health behaviours and the benefits of  
412 PCC would support this to occur more frequently in the absence of 'routine' PCH risk  
413 screening and PCH promotion[23, 29-31, 34, 38, 39, 41, 42]. For example, in an  
414 Australian cross-sectional study[23], approximately half of GPs' (n=304) stated that  
415 they discuss fertility with male patients 'opportunistically' when consulted about a  
416 reproductive health matter when a 'patient specifically asks for advice' and when  
417 consulting with a couple who 'plan to have children;' very few said that they raise the  
418 subject with men 'routinely'[23]. In another cross-sectional study (n=152) from  
419 Australia[30], 74% of nurses stated they discuss PCC in their practice, although only  
420 13% do so 'routinely', and of these, more preconception discussions are held with  
421 women than with men. These findings were similar to a qualitative study[41] from

422 the US where the frequency with which HPs (n=92) engaged in conversations about  
423 reproductive goals ranged from a ‘routine’ component of each visit to ‘episodically’ or  
424 only in response to patients’ ‘question’ or ‘request.’ In a qualitative study from Africa,  
425 all the HPs (n=20) felt that women also have a role in demanding PCC services and  
426 seeking the services[39]. Conversely, in a cross-sectional study from Australia,  
427 midwives (n=338)[29] with a registered nursing qualification were less likely to  
428 agree that planning to conceive is a personal decision that should only be discussed  
429 when initiated by the woman (OR 0.55; 95% CI 0.35, 0.87).

430

## 431 Discussion

432 Findings from this systematic review provide up-to-date insights into the areas that  
433 provide opportunities to improve PCC delivery within healthcare settings based on  
434 HP’s beliefs and attitudes. These include professional and public health education to  
435 increase PCH knowledge and awareness, clinical resources to support HPs providing  
436 PCC, and HP referral networks to support effective PCC delivery to prospective  
437 parents.

438

439 One of the main findings of this review is that, overall, HPs report low PCH literacy  
440 yet would like to receive training, suggesting that they may benefit from PCH  
441 education. Our findings add to those reported in previous systematic reviews (e.g.,  
442 HPs wanting more training to improve confidence to provide PCC and lack in  
443 knowledge of PCH is a barrier to PCC)[6, 7] indicating little has changed and the  
444 PCH education needs of HPs remains to be addressed. There is a high variability of  
445 the content and recommendations across existing PCC-CPGs and a need for  
446 guidelines that are yet to address all clinical PCC areas[11]. Comprehensive PCC-  
447 CPGs that address all evidence-based PCC areas are needed to assist HPs in

448 delivering PCC[11]. However, more than simply developing CPGs to manage the PCH  
449 knowledge of HPs is required. As supported by this review's findings, clinicians often  
450 lack awareness of existing guidelines. While some studies have investigated  
451 interventions that support the knowledge of HPs and effect changes to practice  
452 behaviour[45, 46], further research is needed. Training interventions would benefit  
453 from nuanced consideration of the skills, knowledge, time, and funding for targeted  
454 HP groups. PCH knowledge may also need to be tiered so foundational training can  
455 be included in clinical degrees, with more advanced training available for qualified  
456 clinicians. To tailor and co-develop such interventions to specific HPs, further  
457 understanding of their knowledge gaps and their current and potential scope of  
458 practice concerning PCC is needed.

459  
460 In this review, some HPs reported believing that the onus of responsibility should be  
461 with the patient to seek PCH information and PCC without routine PCH risk  
462 screening and PCH promotion. This belief assumes patient awareness of PCH risk  
463 factors and the benefits of PCC. With the current level of public health education and  
464 understanding of PCH risk factors, this belief may need to be challenged. Similar  
465 findings have been reported by HPs in previous systematic reviews (e.g., client's lack  
466 of awareness of PCC, the benefits of PCC and initiation for PCC)[6, 7]. A focus on  
467 public education of PCH is also needed to increase the public's PCH literacy.  
468 Adherence to guidelines during preconception is an issue previously described in a  
469 systematic review reporting on dietary guideline adherence during preconception  
470 and pregnancy[47]. This review also highlighted the importance of acknowledging  
471 the influence of demographic and social factors on guideline adherence[47].  
472 Implementation interventions are needed that support knowledge translation and  
473 changes to health behaviour through strategies that improve whole population health

474 through the life course (e.g., PCH school education) as well as targeted interventions  
475 to those life course phases where becoming pregnant is more likely or possible (e.g.,  
476 PCH information resources and support tools) or intended (e.g., PCH education and  
477 counselling programmes)[48]. As such, Hall and colleagues' proposed model for PCC  
478 integrates education, digital health interventions, campaigns and social media for  
479 raising PCH awareness among HPs and the public and includes the individualised  
480 and specialised provision of PCC by a range of HPs able to provide clinic-based  
481 counselling, motivational interviewing, provision of supplements and  
482 interconception interventions[5].

483  
484 Some HPs report that the need for clinical PCH resources and time are persistent  
485 barriers to providing effective PCC. HPs would like access to PCH information  
486 resources to support them in delivering PCC. Specifically, HPs identified a range of  
487 resources they would find helpful in clinics, from clinician checklists and clinician  
488 websites to patient information factsheets and patient websites. Clinicians report  
489 that lack of consultation time to provide effective PCC is a barrier, and, in some  
490 instances, clinicians would like to be better funded for PCC by receiving third-party  
491 reimbursement. Similar findings have been reported by HPs in previous systematic  
492 reviews (e.g., a lack of clinical time for PCC and reimbursement for that time,  
493 needing physical space or clinically relevant information such as PCC tools checklists  
494 and PCC guidelines)[6, 7]. Clinical resources are available, providing organisations  
495 and clinicians with information pertinent to implementing PCC programmes[10] and  
496 PCC-CPGs (e.g., PCH risk screening checklist or tool and PCC intervention  
497 guidelines)[9], yet high-quality guidelines on PCC are lacking[11]. Future focus is  
498 needed on assessing the PCH behaviour outcomes associated with healthcare  
499 services that implement PCC programmes and when clinicians can access clinically

500 relevant PCH information resources and PCC-CPGs informed by high-quality  
501 evidence.

502  
503  
504 This review also found that many HPs believe they have a role in PCC. However, they  
505 also attest that primary care HPs (primarily GPs) should be the leading providers.  
506 There are two issues needing further consideration. First, a precedent exists for PCC  
507 to be provided by a broader range of HPs, with the opportunity to improve referral  
508 networks. Second, these HPs may be under the assumption that the patient's GP has  
509 already provided PCC. These findings are barriers to delivering PCC and were  
510 reported by HPs in previous systematic reviews (e.g., a lack of clarity regarding who  
511 is responsible for providing PCC[6, 7] and poor communication between HPs)[7]. A  
512 PCC model that supports collaboration between HPs and utilisation of all capable  
513 HPs[49-51] provides an opportunity to deliver PCC that improves PCH outcomes  
514 throughout the community, including at-risk populations and across the life  
515 course[12]. Meaningful involvement of all key stakeholders is required to co-design  
516 PCC healthcare services that support a coordinated healthcare workforce[50, 51].  
517 Further research is needed to understand the outcomes of an integrated PCC  
518 healthcare services delivery model on PCH risks, PCH behaviours and maternal and  
519 child health outcomes[5].

520

521

522 Limitations

523 This review should be viewed within the context of its limitations. The authors  
524 complied with an accepted review methodology[52], although only 10% of the data  
525 extraction was verified by a second author. As the data being extracted was not  
526 complex and there were no differences identified in the 10% of papers that were

527 checked, the impact of this difference is expected to be minimal. Although the studies  
528 in this review represent a wide range of HPs from varied countries or regions, not all  
529 HPs who may have a role in PCC were represented in the study populations. The  
530 methodological quality of the qualitative studies was good. However, the quantitative  
531 study quality was varied. The heterogeneous nature of the study aims and data  
532 collection methods precluded the pooling of data for meta-analysis. We should also  
533 acknowledge that three studies[19, 33, 37]were included in a previous review[7]. The  
534 research question driving our study had a broader focus than the review by Goossens  
535 and colleagues and identified an additional 24 papers; however, to avoid overlapping  
536 between the two reviews, the findings of the three[19, 33, 37] articles were reported  
537 only when other papers in our review shared similar results.

## 538 Conclusions

539 HPs report insufficient knowledge about PCH, lack PCH training, and want  
540 education on PCH risks and interventions to improve their confidence in providing  
541 PCC and enhanced access to clinical PCH information resources. One of the barriers  
542 they experience to providing effective PCC is an insufficient amount of consultation  
543 time. Most HPs believe it is their role to provide PCC, and referral networks could  
544 improve the delivery of coordinated preconception interventions to identify and  
545 support patients with preconception risks. HPs want increased public health  
546 education that improves patient awareness of PCH risks and benefits of PCC. These  
547 barriers and facilitators to the provision of PCC reported by HPs in studies  
548 conducted in the past five years have remained very similar when compared to  
549 previous reviews of earlier studies on the topic. To improve the provision of PCC  
550 going forward, there is a need to co-develop professional and public PCH education,  
551 PCC clinical resources, and an integrated PCC healthcare service model.

552

## 553 List of abbreviations

554 AXIS - Appraisal tool for Cross-Sectional Studies

555 CASP - Critical Appraisal Skills Programme

556 CPG – Clinical practice guideline

557 GP – General Practitioner

558 HP – Health professional

559 MCaFHN – Maternal child and family health nurses

560 PCC – Preconception Care

561 PCH – Preconception health

562 PROSPERO - Prospective Register of Systematic Reviews

563 UK – United Kingdom

564 US – United States

## 565 Declarations

566 Ethics approval and consent to participate

567 Not applicable.

568 Consent for publication

569 Not applicable.

570 Availability of data and materials

571 All data generated during this study are included in this published article [and its

572 supplementary information files].

573 Competing interests

574 The authors declare they have no competing interests.

## 575 Funding

576 The lead reviewer, CC, received an Australian Government Research Training  
577 Program Scholarship. DS is supported by the National Institute for Health and Care  
578 Research (NIHR) through an NIHR Advanced Fellowship (NIHR302955) and the  
579 NIHR Southampton Biomedical Research Centre (NIHR203319). The views  
580 expressed are those of the author(s) and not necessarily those of the NIHR or the  
581 Department of Health and Social Care. AS is supported by an Australian Research  
582 Council Future Fellowship (FT220100610). Funding sources have not had any role in  
583 conducting the systematic review.

## 584 Authors' contributions

585 CC designed the protocol, performed the searches, screening, quality appraisal, data  
586 extraction, and data analysis, and drafted, reviewed, and edited the manuscript. DS  
587 was the second reviewer for article screening at the title and abstract stage; AS was  
588 the second reviewer for article screening at the full-text stage, quality appraisal and  
589 data extraction; and AS, DS and EM reviewed and edited the manuscript.

## 590 Acknowledgements

591  
592 Not applicable.

593

## 594 **Supplementary File 1. Search Strategy**

## 595 **Supplementary File 2. Full-text articles excluded with reason**

596

597

598

599

600

601

602

603

604

605



606  
607  
608  
609  
610

## REFERENCES

- 611 1. Caut C, Schoenaker D, McIntyre E, Vilcins D, Gavine A, Steel A. Relationships  
612 between Women's and Men's Modifiable Preconception Risks and Health Behaviors  
613 and Maternal and Offspring Health Outcomes: An Umbrella Review. *Semin Reprod*  
614 *Med.* 2022;40(03/04):170-83. doi: 10.1055/s-0042-1744257.
- 615 2. Daly M, Kipping RR, Tinner LE, Sanders J, White James W. Preconception  
616 exposures and adverse pregnancy, birth and postpartum outcomes: Umbrella review  
617 of systematic reviews. *Paediatric and Perinatal Epidemiology.* 2022;36(2):288-99.  
618 doi: <https://doi.org/10.1111/ppe.12855>.
- 619 3. Carter T, Schoenaker D, Adams J, Steel A. Paternal preconception modifiable risk  
620 factors for adverse pregnancy and offspring outcomes: a review of contemporary  
621 evidence from observational studies. *BMC Public Health.* 2023;23(1):509.
- 622 4. Christiansen C, Chandra-Mouli V, Ogbaselassie L, Willumsen J, Mason E. Meeting  
623 to develop a global consensus on preconception care to reduce maternal and  
624 childhood mortality and morbidity: World Health Organization Headquarters,  
625 Geneva, 6–7 February 2012: meeting report. 2013.
- 626 5. Hall J, Chawla M, Watson D, Jacob CM, Schoenaker D, Connolly A, et al.  
627 Addressing reproductive health needs across the life course: an integrated,  
628 community-based model combining contraception and preconception care. *The*  
629 *Lancet Public Health.* 2023;8(1):e76-e84. doi: [https://doi.org/10.1016/S2468-](https://doi.org/10.1016/S2468-2667(22)00254-7)  
630 [2667\(22\)00254-7](https://doi.org/10.1016/S2468-2667(22)00254-7).
- 631 6. Steel A, Lucke J, Reid R, Adams J. A systematic review of women's and health  
632 professional's attitudes and experience of preconception care service delivery. *Family*  
633 *Practice.* 2016;33(6):588-95.
- 634 7. Goossens J, De Roose M, Van Hecke A, Goemaes R, Verhaeghe S, Beeckman D.  
635 Barriers and facilitators to the provision of preconception care by healthcare  
636 providers: a systematic review. *International journal of nursing studies.* 2018;87:113-  
637 30.
- 638 8. Atrash H, Jack B. Preconception care to improve pregnancy outcomes: The  
639 science. *J Hum Growth Dev.* 2020;30(3):334-41.
- 640 9. Atrash H, Jack B. Preconception care to improve pregnancy outcomes: clinical  
641 practice guidelines. *Journal of Human Growth and Development.* 2020;30(3):407-  
642 16.
- 643 10. Atrash H, Jack B. Preconception care: developing and implementing regional and  
644 national programs. *J Hum Growth Dev.* 2020;30(3):363-71.
- 645 11. Dorney E, Boyle JA, Walker R, Hammarberg K, Musgrave L, Schoenaker D, et al.  
646 A Systematic Review of Clinical Guidelines for Preconception Care. *Semin Reprod*  
647 *Med.* 2022;40(03/04):157-69. doi: 10.1055/s-0042-1748190.
- 648 12. Boyle JA, Black K, Dorney E, Amor DJ, Brown L, Callander E, et al. Setting  
649 Preconception Care Priorities in Australia Using a Delphi Technique. *Semin Reprod*  
650 *Med.* 2022;40(03/04):214-26. doi: 10.1055/s-0042-1749683.
- 651 13. Page MJ, McKenzie JE, Bossuyt PM, Boutron I, Hoffmann TC, Mulrow CD, et al.  
652 Updating guidance for reporting systematic reviews: development of the PRISMA  
653 2020 statement. *Journal of Clinical Epidemiology.* 2021;134:103-12. doi:  
654 <https://doi.org/10.1016/j.jclinepi.2021.02.003>.
- 655 14. Veritas Health Innovation. Covidence systematic review software. Melbourne,  
656 Australia 2022.

- 657 15. Critical Appraisal Skills Programme: CASP Qualitative Checklist. [https://casp-](https://casp-uk.net/images/checklist/documents/CASP-Qualitative-Studies-Checklist/CASP-Qualitative-Checklist-2018_fillable_form.pdf)  
658 [uk.net/images/checklist/documents/CASP-Qualitative-Studies-Checklist/CASP-](https://casp-uk.net/images/checklist/documents/CASP-Qualitative-Studies-Checklist/CASP-Qualitative-Checklist-2018_fillable_form.pdf)  
659 [Qualitative-Checklist-2018\\_fillable\\_form.pdf](https://casp-uk.net/images/checklist/documents/CASP-Qualitative-Studies-Checklist/CASP-Qualitative-Checklist-2018_fillable_form.pdf) (2018). Accessed.
- 660 16. Downes MJ, Brennan ML, Williams HC, Dean RS. Development of a critical  
661 appraisal tool to assess the quality of cross-sectional studies (AXIS). *BMJ Open*.  
662 2016;6(12):e011458. doi: 10.1136/bmjopen-2016-011458.
- 663 17. Pope C, Ziebland S, Mays N. Analysing qualitative data. *Bmj*.  
664 2000;320(7227):114-6.
- 665 18. Briggs A, Nouri PK, Galloway M, O'Leary K, Pereira N, Lindheim SR. Expanded  
666 carrier screening: a current survey of physician utilization and attitudes. *J Assist*  
667 *Reprod Genet*. 2018;35(9):1631-40. doi: [https://dx.doi.org/10.1007/s10815-018-](https://dx.doi.org/10.1007/s10815-018-1272-8)  
668 [1272-8](https://dx.doi.org/10.1007/s10815-018-1272-8).
- 669 19. Fieldwick D, Smith A, Paterson H. General practitioners and preconception  
670 weight management in New Zealand. *Australian & New Zealand Journal of*  
671 *Obstetrics & Gynaecology*. 2017;57(4):420-5. doi:  
672 <https://dx.doi.org/10.1111/ajo.12609>.
- 673 20. Ganganna A, Devishree G, Devishree G. Opinion of dentists and gynecologists on  
674 the link between oral health and preterm low birth weight: "Preconception care -  
675 treat beyond the box". *Journal of the Indian Society of Pedodontics & Preventive*  
676 *Dentistry*. 2017;35(1):47-50. doi: 10.4103/0970-4388.199231.
- 677 21. Guess K, Malek L, Anderson A, Makrides M, Zhou SJ. Knowledge and practices  
678 regarding iodine supplementation: A national survey of healthcare providers.  
679 *Women Birth*. 2017;30(1):e56-e60. doi:  
680 <https://dx.doi.org/10.1016/j.wombi.2016.08.007>.
- 681 22. Hammarberg K, Taylor L. Survey of Maternal, Child and Family Health Nurses'  
682 attitudes and practice relating to preconception health promotion. *Aust J Prim*  
683 *Health*. 2019;25(1):43-8. doi: <https://dx.doi.org/10.1071/PY18078>.
- 684 23. Hogg K, Rizio T, Manocha R, McLachlan RI, Hammarberg K. Men's  
685 preconception health care in Australian general practice: GPs' knowledge, attitudes  
686 and behaviours. *Aust J Prim Health*. 2019;25(4):353-8. doi: 10.1071/py19069.
- 687 24. Kizirian NV, Black KI, Musgrave L, Hespe C, Gordon A. Understanding and  
688 provision of preconception care by general practitioners. *Australian & New Zealand*  
689 *Journal of Obstetrics & Gynaecology*. 2019;59(6):799-804. doi: 10.1111/ajo.12962.
- 690 25. Manze MG, Calixte C, Romero DR, Roberts L, Perlman M, Langston A, et al.  
691 Physician perspectives on routine pregnancy intention screening and counseling in  
692 primary care. *Contraception*. 2020;101(2):91-6. doi:  
693 <https://dx.doi.org/10.1016/j.contraception.2019.11.004>.
- 694 26. Mida LA, della Zazzera V, Fontaine-Bisson B. Knowledge, attitude and practice of  
695 physicians regarding periconceptual folic acid for women at low risk of a neural  
696 tube defect affected pregnancy. *Preventive Medicine Reports*. 2021;22 (no  
697 pagination). doi: <http://dx.doi.org/10.1016/j.pmedr.2021.101327>.
- 698 27. Ukoha WC, Dube M. Primary health care nursing students' knowledge of and  
699 attitude towards the provision of preconception care in KwaZulu-Natal. *Afr*.  
700 2019;11(1):e1-e8. doi: <https://dx.doi.org/10.4102/phcfm.v11i1.1916>.
- 701 28. Wang C, Luo S, Yang D, Yan J, Ding Y, Wang S, et al. Current practice and  
702 perspectives of healthcare providers regarding preconception care for women with  
703 type 1 diabetes in China. *Diabetes Metab Res Rev*. 2021;37(4):e3454. doi:  
704 <https://dx.doi.org/10.1002/dmrr.3454>.
- 705 29. Bradfield Z, Leefhelm E, Soh SE, et al. The MidPIC study: Midwives' knowledge,  
706 perspectives and learning needs regarding preconception and interconception care.  
707 *PLoS ONE*. 2023;18(11).

- 708 30. Dorney E, Millard J, Hammarberg K, Griffin K, Gordon A, McGeechan K, et al.  
709 Australian primary health care nurses' knowledge, practice and attitudes relating to  
710 preconception care: learnings for service implementation. *Aust J Prim Health*.  
711 2022;28(1):63-8. doi: [10.1071/PY21104](https://doi.org/10.1071/PY21104).  
712 31. Scheele J, Smith SM, Wahab RJ, Bais B, Steegers-Theunissen RPM, Gaillard R,  
713 et al. Current preconception care practice in the Netherlands – An evaluation study  
714 among birth care professionals. *Midwifery*. 2023;127:N.PAG-N.PAG. doi:  
715 [10.1016/j.midw.2023.103855](https://doi.org/10.1016/j.midw.2023.103855).  
716 32. Kurniawati W, Afiyanti Y, Prasetyo S, Achadi EL, Kumboyono K. The perspective  
717 of healthcare practitioners on preconception care at primary healthcare in Jakarta: A  
718 qualitative study. *International Journal of Africa Nursing Sciences*. 2021;15 (no  
719 pagination). doi: <http://dx.doi.org/10.1016/j.ijans.2021.100351>.  
720 33. Poels M, Koster MP, Franx A, van Stel HF. Healthcare providers' views on the  
721 delivery of preconception care in a local community setting in the Netherlands. *BMC*  
722 *Health Serv Res*. 2017;17(1):92. doi: <https://dx.doi.org/10.1186/s12913-017-2051-4>.  
723 34. Chutke AP, Doke PP, Gothankar JS, Pore PD, Palkar SH, Patil AV, et al.  
724 Perceptions of and challenges faced by primary healthcare workers about  
725 preconception services in rural India: A qualitative study using focus group  
726 discussion. *Frontiers in public health*. 2022;10:888708. doi:  
727 <https://dx.doi.org/10.3389/fpubh.2022.888708>.  
728 35. Silverio SA, Karki P, Lakhani S, Alter M, Weinman J, Flynn AC. 'People still want  
729 a face and that's where we can fill in': a qualitative study of community pharmacists'  
730 experiences of providing healthcare advice about preconception and pregnancy. *The*  
731 *International journal of pharmacy practice*. 2023;31(1):38-45. doi:  
732 <https://dx.doi.org/10.1093/ijpp/riac097>.  
733 36. Janssens S, Chokoshvili D, Vears DF, De Paepe A, Borry P. Pre- and post-testing  
734 counseling considerations for the provision of expanded carrier screening:  
735 exploration of European geneticists' views. *BMC Med Ethics*. 2017;18(1):46. doi:  
736 <https://dx.doi.org/10.1186/s12910-017-0206-9>.  
737 37. M'Hamdi H I, van Voorst SF, Pinxten W, Hilhorst MT, Steegers EA. Barriers in  
738 the Uptake and Delivery of Preconception Care: Exploring the Views of Care  
739 Providers. *Matern Child Health J*. 2017;21(1):21-8. doi:  
740 <https://dx.doi.org/10.1007/s10995-016-2089-7>.  
741 38. Molinaro ML, Evans M, Regnault TRH, de Vrijer B. Translating developmental  
742 origins of health and disease in practice: health care providers' perspectives. *J Dev*  
743 *Orig Health Dis*. 2021;12(3):404-10. doi:  
744 <https://dx.doi.org/10.1017/S2040174420000483>.  
745 39. Munthali M, Chiumia IK, Mandiwa C, Mwale S. Knowledge and perceptions of  
746 preconception care among health workers and women of reproductive age in Mzuzu  
747 City, Malawi: a cross-sectional study. *Reprod Health*. 2021;18(1):229. doi:  
748 <https://dx.doi.org/10.1186/s12978-021-01282-w>.  
749 40. Ojifinni OO, Ibisomi L. Health care providers perceptions about preconception  
750 care in ibadan, southwest nigeria: A qualitative study. *Maternal and Child Health*  
751 *Journal*. 2022. doi: [10.1007/s10995-021-03305-1](https://doi.org/10.1007/s10995-021-03305-1).  
752 41. Simone J, Hoyt MJ, Storm DS, Finocchiaro-Kessler S. Models of HIV  
753 Preconception Care and Key Elements Influencing These Services: Findings from  
754 Healthcare Providers in Seven US Cities. *AIDS Patient Care STDS*. 2018;32(7):272-  
755 81. doi: <https://dx.doi.org/10.1089/apc.2017.0299>.  
756 42. Nacev EC, Greene MZ, Taboada MP, Ehrental DB. Factors Influencing Provider  
757 Behavior Around Delivery of Preconception Care. *Matern Child Health J*.  
758 2022;26(7):1567-75. doi: [10.1007/s10995-022-03411-8](https://doi.org/10.1007/s10995-022-03411-8).

- 759 43. Devido JA, Doswell WM, Braxter BJ, et al. Experiences of Parish Nurses in  
760 Providing Diabetes Education and Preconception Counseling to Women With  
761 Diabetes. *JOGNN: Journal of Obstetric, Gynecologic and Neonatal Nursing*.  
762 2017;46(2):248-57.
- 763 44. Maas VYF, Poels M, Hölscher IM, van Vliet-Lachotzki EH, Franx A, Koster MPH.  
764 How to improve preconception care in a local setting? Views from Dutch  
765 multidisciplinary healthcare providers. *Midwifery*. 2022;103274. doi:  
766 <https://doi.org/10.1016/j.midw.2022.103274>.
- 767 45. de Castro Nascimento N, Borges ALV, Fujimori E, Reis-Muleva B. Training in  
768 preconception care focused on primary health care providers: Effects on  
769 preconception care knowledge and provision. *Heliyon*. 2024;10(9).
- 770 46. Hauser KW, Lilly CM, Frías JL. Florida health care providers' knowledge of folic  
771 acid for the prevention of neural tube defects. *SOUTHERN MEDICAL JOURNAL-*  
772 *BIRMINGHAM ALABAMA-*. 2004;97:437-9.
- 773 47. Caut C, Leach M, Steel A. Dietary guideline adherence during preconception and  
774 pregnancy: A systematic review. *Maternal & Child Nutrition*. 2020;16(2):e12916. doi:  
775 <https://doi.org/10.1111/mcn.12916>.
- 776 48. Barker M, Dombrowski SU, Colbourn T, Fall CHD, Kriznik NM, Lawrence WT, et  
777 al. Intervention strategies to improve nutrition and health behaviours before  
778 conception. *Lancet*. 2018;391(10132):1853-64. doi: 10.1016/s0140-6736(18)30313-1.
- 779 49. Steel A, Schloss J, Leach M, Adams J. The naturopathic profession in Australia: A  
780 secondary analysis of the Practitioner Research and Collaboration Initiative (PRACI).  
781 *Complementary Therapies in Clinical Practice*. 2020;40:101220. doi:  
782 <https://doi.org/10.1016/j.ctcp.2020.101220>.
- 783 50. Walker R, Morris H, Lang S, Hampton K, Boyle J, Skouteris H. Co-designing  
784 preconception and pregnancy care for healthy maternal lifestyles and obesity  
785 prevention. *Women and Birth*. 2020;33(5):473-8. doi:  
786 <https://doi.org/10.1016/j.wombi.2019.11.005>.
- 787 51. Steel A. Creating a Vision for Family-Centered Health Services for the Five  
788 'Trimesters': Co-Design Meeting Summary Report. University of Technology Sydney  
789 2021.
- 790 52. Shea BJ, Reeves BC, Wells G, Thuku M, Hamel C, Moran J, et al. AMSTAR 2: a  
791 critical appraisal tool for systematic reviews that include randomised or non-  
792 randomised studies of healthcare interventions, or both. *bmj*. 2017;358.
- 793

## Identification of studies via databases and registers

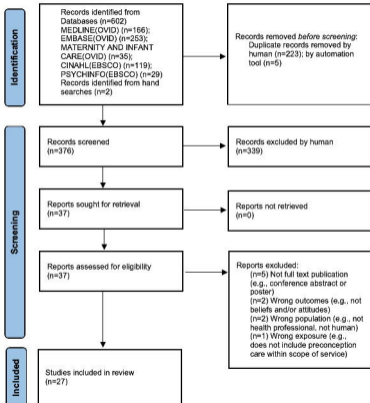

Source: https://medrxiv.org/content/medrxiv/early/2025/01/07/2024.09.16.24313739.full.pdf
